# Supplementary material for: Effects of Maternal Diabetes and Diet on Gene Expression in the Murine Placenta
Source: MDPI journal article supplement (doi:10.3390/genes13010130), 2022-01-12
Supplement: s1 [file s1]

## DESCRIPTION

Laboratory Rodent Diet is recommended for rats, mice, hamsters and gerbils. This diet is a complete life cycle diet formulated using managed formulation, delivering Constant Nutrition®. This is paired with the selection of highest quality ingredients to assure minimal inherent biological variation in long-term studies. It is formulated for life-cycle nutrition; however, it is not designed for maximizing production in mouse breeding colonies. This product has been the standard of biomedical research for over 70 years.

## Features and Benefits

- [Managed Formulation delivers Constant Nutrition®](#)
- High quality animal protein added to create a superior balance of amino acids for optimum performance
- Formulated for multiple species for single product inventory
- The rodent diet standard for biomedical research

## Product Forms Available

|                                        | Catalog # |
|----------------------------------------|-----------|
| • Oval pellet, 3/8" x 5/8" x 1", 50 lb | 0001319   |
| • Oval pellet, 3/8" x 5/8" x 1", 15 kg | 0006505   |
| • Meal (ground pellets), 15 kg         | 0006508*  |
| • Meal (ground pellets), 50 lb         | 0001320   |

\* For ordering, contact [info@LabDiet.com](mailto:info@LabDiet.com)

## Other Irradiated Versions Available

|                                                                                  | Catalog #   |
|----------------------------------------------------------------------------------|-------------|
| • 5L0D PicoLab® Laboratory Rodent Diet, Pelleted, Irradiated, 30 lb              | 3005659-220 |
| • 5L0D PicoLab® Laboratory Rodent Diet, Meal (ground pellets), Irradiated, 30 lb | 3005659-020 |

## GUARANTEED ANALYSIS

|                             |        |
|-----------------------------|--------|
| Crude protein not less than | 23.00% |
| Crude fat not less than     | 4.50%  |
| Crude fiber not more than   | 6.00%  |
| Moisture not more than      | 12.00% |
| Ash not more than           | 8.00%  |

## INGREDIENTS

Ground Corn, Dehulled Soybean Meal, Dried Plain Beet Pulp, Fish Meal, Ground Oats, Dehydrated Alfalfa Meal, Brewers Dried Yeast, Cane Molasses, Wheat Germ, Dried Whey, Porcine Animal Fat Preserved with BHA and Citric Acid, Porcine Meat and Bone Meal, Wheat Middlings, Salt, Calcium Carbonate, DL-Methionine, Choline Chloride, Cholecalciferol (Vitamin D3), Vitamin A Acetate, Folic Acid, Menadione Dimethylpyrimidinol Bisulfite (Vitamin K), Pyridoxine Hydrochloride, Thiamine Mononitrate, Nicotinic Acid, Calcium Pantothenate, DL-Alpha Tocopheryl Acetate (Vitamin E), Manganous Oxide, Vitamin B12 Supplement, Zinc Oxide, Ferrous Carbonate, Copper Sulfate, Ferrous Sulfate, Riboflavin Supplement, Zinc Sulfate, Calcium Iodate, Cobalt Carbonate, Biotin, Sodium Selenite.

## FEEDING DIRECTIONS

Feed ad libitum to rodents. Plenty of fresh, clean water should be available to the animals at all times.

**Rats**- All rats will eat varying amounts of feed depending on their genetic origin. Larger strains will eat up to 30 grams per day. Smaller strains will eat up to 15 grams per day. Feeders in rat cages should be designed to hold two to three days supply of feed at one time.

**Mice**-Adult mice will eat up to 5 grams of pelleted ration daily. Some of the larger strains may eat as much as 8 grams per day per animal. Feed should be available on a free choice basis in wire feeders above the floor of the cage.

**Hamsters**-Adults will eat up to 14 grams per day.

For information regarding shelf life please visit [www.labdiet.com](http://www.labdiet.com).

## CHEMICAL COMPOSITION<sup>1</sup>

### Nutrients<sup>2</sup>

|                  |      |                       |      |
|------------------|------|-----------------------|------|
| Protein, %       | 24.1 | Fluorine, ppm         | 15   |
| Arginine, %      | 1.51 | Iron, ppm             | 240  |
| Cystine, %       | 0.38 | Zinc, ppm             | 75   |
| Glycine, %       | 1.24 | Manganese, ppm        | 71   |
| Histidine, %     | 0.60 | Copper, ppm           | 13   |
| Isoleucine, %    | 1.03 | Cobalt, ppm           | 0.96 |
| Leucine, %       | 1.83 | Iodine, ppm           | 1.00 |
| Lysine, %        | 1.43 | Chromium (added), ppm | 0.01 |
| Methionine, %    | 0.60 | Selenium, ppm         | 0.41 |
| Phenylalanine, % | 1.06 |                       |      |
| Tyrosine, %      | 0.74 |                       |      |
| Threonine, %     | 0.94 |                       |      |
| Tryptophan, %    | 0.27 |                       |      |
| Valine, %        | 1.12 |                       |      |
| Serine, %        | 1.13 |                       |      |
| Aspartic Acid, % | 2.71 |                       |      |
| Glutamic Acid, % | 4.54 |                       |      |
| Alanine, %       | 1.42 |                       |      |
| Proline, %       | 1.43 |                       |      |
| Taurine, %       | 0.03 |                       |      |

### Vitamins

|                                       |      |
|---------------------------------------|------|
| Carotene, ppm                         | 2.5  |
| Vitamin K, ppm                        | 1.3  |
| Thiamin, ppm                          | 16   |
| Riboflavin, ppm                       | 4.7  |
| Niacin, ppm                           | 130  |
| Pantothenic Acid, ppm                 | 24   |
| Choline, ppm                          | 1840 |
| Folic Acid, ppm                       | 7.2  |
| Pyridoxine, ppm                       | 6.1  |
| Biotin, ppm                           | 0.30 |
| B <sub>12</sub> , mcg/kg              | 51   |
| Vitamin A, IU/gm                      | 18   |
| Vitamin D <sub>3</sub> (added), IU/gm | 4.6  |
| Vitamin E, IU/kg                      | 42   |
| Ascorbic Acid, mg/gm                  | 0.0  |

### Fat (ether extract), %

### Fat (acid hydrolysis), %

|                                |      |
|--------------------------------|------|
| Cholesterol, ppm               | 196  |
| Linoleic Acid, %               | 1.25 |
| Linolenic Acid, %              | 0.12 |
| Arachidonic Acid, %            | 0.02 |
| Omega-3 Fatty Acids, %         | 0.31 |
| Total Saturated Fatty Acids, % | 1.39 |
| Total Monounsaturated          |      |
| Fatty Acids, %                 | 1.52 |

### Fiber (Crude), %

|                                          |      |
|------------------------------------------|------|
| Neutral Detergent Fiber <sup>3</sup> , % | 16.9 |
| Acid Detergent Fiber <sup>4</sup> , %    | 7.0  |

### Nitrogen-Free Extract

### (by difference), %

|            |      |
|------------|------|
| Starch, %  | 21.9 |
| Sucrose, % | 3.25 |

### Total Digestible Nutrients, %

### Gross Energy, kcal/gm

### Physiological Fuel Value<sup>5</sup>,

### kcal/gm

### Metabolizable Energy,

### kcal/gm

### Minerals

|                             |      |
|-----------------------------|------|
| Ash, %                      | 7.2  |
| Calcium, %                  | 0.95 |
| Phosphorus, %               | 0.67 |
| Phosphorus (non-phytate), % | 0.41 |
| Potassium, %                | 1.22 |
| Magnesium, %                | 0.21 |
| Sulfur, %                   | 0.33 |
| Sodium, %                   | 0.39 |
| Chloride, %                 | 0.65 |

### Calories provided by:

|                        |        |
|------------------------|--------|
| Protein, %             | 28.903 |
| Fat (ether extract), % | 13.606 |
| Carbohydrates, %       | 57.491 |

1. Formulation based on calculated values from the latest ingredient analysis information. Since nutrient composition of natural ingredients varies and some nutrient loss will occur due to manufacturing processes, analysis will differ accordingly.

2. Nutrients expressed as percent of ration except where otherwise indicated. Moisture content is assumed to be 10.0% for the purpose of calculations.

3. NDF = approximately cellulose, hemicellulose and lignin.

4. ADF = approximately cellulose and lignin.

5. Physiological Fuel Value (kcal/gm) = Sum of decimal fractions of protein, fat and carbohydrate (use Nitrogen Free Extract) x 4,9,4 kcal/gm respectively.

**NOTE: When assayed, actual levels may vary from calculated values.**

## DESCRIPTION

Mouse Diet is high energy diet specifically designed to support reproduction, growth and maintenance of mice. This diet is a complete life cycle diet formulated using managed formulation, delivering Constant Nutrition®. This is paired with the selection of highest quality ingredients to assure minimal inherent biological variation in long-term studies. It contains 11% fat to fulfill the metabolic needs of certain mouse strains. Mouse Diet is beneficial in maintaining maximum reproduction for postpartum matings where females are under simultaneous stress of lactation and gestation.

### Features and Benefits

- [Managed Formulation delivers Constant Nutrition®](#)
- A high-energy diet formulated specifically for all mouse colonies
- Helps maintain maximum reproduction for postpartum matings
- Recommended for mice with low feed intake to improve performance

| Product Forms Available                                                                        | Catalog #   |
|------------------------------------------------------------------------------------------------|-------------|
| • Oval pellet, 3/8" x 5/8" x 1", 50 lb                                                         | 0001328     |
| • Meal (ground pellets)                                                                        | **0005309   |
| Other Irradiated Versions Available                                                            | Catalog #   |
| • 5LJ5: PicoLab® High Energy Mouse Diet, Irradiated, 30 lb                                     | 3005992-220 |
| • 5LP1: Pico-Vac® High Energy Mouse Diet, Irradiated 5 lb vacuum sealed, 6 per box (30 lb box) | 0055212     |
| * For ordering, contact <a href="mailto:info@LabDiet.com">info@LabDiet.com</a>                 |             |

## GUARANTEED ANALYSIS

|                             |        |
|-----------------------------|--------|
| Crude protein not less than | 17.00% |
| Crude fat not less than     | 11.00% |
| Crude fiber not more than   | 3.00%  |
| Moisture not more than      | 12.00% |
| Ash not more than           | 6.50%  |

## INGREDIENTS

Ground Wheat, Dehulled Soybean Meal, Ground Corn, Wheat Germ, Brewers Dried Yeast, Porcine Animal Fat Preserved with BHA and BHT and Citric Acid, Condensed Whey, Condensed Whey Solubles, Calcium Carbonate, Soybean Oil, Dried Whey Protein Concentrate, Salt, Mono and Diglycerides of Edible Fats, DL-Methionine, Dicalcium Phosphate, Menadione Dimethylpyrimidinol Bisulfite (Vitamin K), Choline Chloride, Pyridoxine Hydrochloride, Cholecalciferol (Vitamin D3), Vitamin A Acetate, Manganous Oxide, DL-Alpha Tocopheryl Acetate (Vitamin E), Zinc Oxide, Folic Acid, Ferrous Carbonate, Vitamin B12 Supplement, Ferrous Sulfate, Thiamine Mononitrate, Calcium Pantothenate, Copper Sulfate, Nicotinic Acid, Riboflavin Supplement, Zinc Sulfate, Calcium Iodate, Cobalt Carbonate, Sodium Selenite, Biotin.

## FEEDING DIRECTIONS

Mouse Diet should be fed to breeders and lactating females on a free-choice basis. Plenty of fresh, clean water should be available to the animals at all times.

**Mice**-Adult mice will eat up to 5 grams of pelleted ration daily. Some of the larger strains may eat as much as 8 grams per day per animal. Feed should be available on a free choice basis in wire feeders above the floor of the cage.

For information regarding shelf life please visit [www.labdiet.com](http://www.labdiet.com).

## CHEMICAL COMPOSITION<sup>1</sup>

| Nutrients <sup>2</sup>                               |             |                                       |        |
|------------------------------------------------------|-------------|---------------------------------------|--------|
| <b>Protein, %</b>                                    | <b>19.0</b> | Iron, ppm                             | 170    |
| Arginine, %                                          | 1.16        | Zinc, ppm                             | 110    |
| Cystine, %                                           | 0.37        | Manganese, ppm                        | 120    |
| Glycine, %                                           | 0.81        | Copper, ppm                           | 17     |
| Histidine, %                                         | 0.47        | Cobalt, ppm                           | 0.63   |
| Isoleucine, %                                        | 0.85        | Iodine, ppm                           | 1.45   |
| Leucine, %                                           | 1.43        | Chromium (added), ppm                 | 0.02   |
| Lysine, %                                            | 1.05        | Selenium, ppm                         | 0.30   |
| Methionine, %                                        | 0.61        |                                       |        |
| Phenylalanine, %                                     | 0.87        | <b>Vitamins</b>                       |        |
| Tyrosine, %                                          | 0.55        | Carotene, ppm                         | 0.2    |
| Threonine, %                                         | 0.72        | Vitamin K, ppm                        | 3.0    |
| Tryptophan, %                                        | 0.24        | Thiamin, ppm                          | 12.5   |
| Valine, %                                            | 0.90        | Riboflavin, ppm                       | 5.5    |
| Serine, %                                            | 1.01        | Niacin, ppm                           | 75     |
| Aspartic Acid, %                                     | 2.04        | Pantothenic Acid, ppm                 | 20     |
| Glutamic Acid, %                                     | 4.18        | Choline, ppm                          | 1500   |
| Alanine, %                                           | 1.00        | Folic Acid, ppm                       | 2.9    |
| Proline, %                                           | 1.30        | Pyridoxine, ppm                       | 9.6    |
| Taurine, %                                           | 0.00        | Biotin, ppm                           | 0.30   |
| <b>Fat (ether extract), %</b>                        | <b>11.1</b> | B <sub>12</sub> , mcg/kg              | 51     |
| <b>Fat (acid hydrolysis), %</b>                      | <b>12.0</b> | Vitamin A, IU/gm                      | 18     |
| Cholesterol, ppm                                     | 31          | Vitamin D <sub>3</sub> (added), IU/gm | 3.3    |
| Linoleic Acid, %                                     | 2.08        | Vitamin E, IU/kg                      | 66     |
| Linolenic Acid, %                                    | 0.16        | Ascorbic Acid, mg/gm                  | 0.00   |
| Arachidonic Acid, %                                  | 0.03        |                                       |        |
| Omega-3 Fatty Acids, %                               | 0.21        | <b>Calories provided by:</b>          |        |
| Total Saturated Fatty Acids, %                       | 3.70        | Protein, %                            | 19.896 |
| Total Monounsaturated                                |             | Fat (ether extract), %                | 26.088 |
| Fatty Acids, %                                       | 3.95        | Carbohydrates, %                      | 54.016 |
| <b>Fiber (Crude), %</b>                              | <b>2.3</b>  |                                       |        |
| Neutral Detergent Fiber <sup>3</sup> , %             | 10.1        |                                       |        |
| Acid Detergent Fiber <sup>4</sup> , %                | 2.9         |                                       |        |
| <b>Nitrogen-Free Extract</b>                         |             |                                       |        |
| <b>(by difference), %</b>                            | <b>51.7</b> |                                       |        |
| Starch, %                                            | 33.5        |                                       |        |
| Sucrose, %                                           | 0.90        |                                       |        |
| <b>Total Digestible Nutrients, %</b>                 | <b>85.2</b> |                                       |        |
| <b>Gross Energy, kcal/gm</b>                         | <b>4.74</b> |                                       |        |
| <b>Physiological Fuel Value<sup>5</sup>, kcal/gm</b> | <b>3.83</b> |                                       |        |
| <b>Metabolizable Energy, kcal/gm</b>                 | <b>3.58</b> |                                       |        |
|                                                      |             |                                       |        |
| <b>Minerals</b>                                      |             |                                       |        |
| <b>Ash, %</b>                                        | <b>5.8</b>  |                                       |        |
| Calcium, %                                           | 0.80        |                                       |        |
| Phosphorus, %                                        | 0.50        |                                       |        |
| Phosphorus (non-phytate), %                          | 0.25        |                                       |        |
| Potassium, %                                         | 0.80        |                                       |        |
| Magnesium, %                                         | 0.15        |                                       |        |
| Sulfur, %                                            | 0.25        |                                       |        |
| Sodium, %                                            | 0.43        |                                       |        |
| Chloride, %                                          | 0.70        |                                       |        |
| Fluorine, ppm                                        | 8.4         |                                       |        |

1. Formulation based on calculated values from the latest ingredient analysis information. Since nutrient composition of natural ingredients varies and some nutrient loss will occur due to manufacturing processes, analysis will differ accordingly.

2. Nutrients expressed as percent of ration except where otherwise indicated. Moisture content is assumed to be 10.0% for the purpose of calculations.

3. NDF = approximately cellulose, hemi-cellulose and lignin.

4. ADF = approximately cellulose and lignin.

5. Physiological Fuel Value (kcal/gm) = Sum of decimal fractions of protein, fat and carbohydrate (use Nitrogen Free Extract) x 4,9,4 kcal/gm respectively.

**NOTE: When assayed, actual levels may vary from calculated values.**
